# Supplementary material for: Ovatodiolide Targetsβ-Catenin Signaling in Suppressing Tumorigenesis and Overcoming Drug Resistance in Renal Cell Carcinoma
Source: Hindawi journal article supplement (doi:10.1155/2013/161628), 2013-01-01
Supplement: f1 [file 161628.f1.pdf]

## Supplemental figure legends

**Figure S1.** Ovatodiolide specifically inhibits WNT/ $\beta$ -catenin signaling. (A) After 24 hr of transfection with TOPflash or FOPflash plasmids, each compound (20 and 40  $\mu$ M) or DMSO was added to cells and luciferase activity was measured after 24-hr treatment. The pGL4.71 renilla luciferase vector (Promega) was cotransfected as a transfection control, and luciferase activity was measured within 20 min. Psoralen was used as a WNT/ $\beta$ -catenin signaling inductive control. (B) After 24 hr of transfection, cells were treated with 25 ng/ml recombinant human WNT3a (rhWNT3a) or 20 mM LiCl containing ovatodiolide or DMSO for an additional 24 hr. The control group was ovatodiolide or DMSO alone. (C) Immunocytochemistry with 40  $\mu$ M ovatodiolide shows inhibited  $\beta$ -catenin nuclear translocation and its downstream genes cyclin D1 and survivin. The positivity of each marker was quantified with Aperio ImageScope and Spectrum Software. Data are mean $\pm$ SD of triplicate experiments. (D) Western blot assay of effect of 40  $\mu$ M ovatodiolide on protein levels of active  $\beta$ -catenin (p- $\beta$ -catenin [S552]) and its downstream genes (c-myc, cyclin D1 and survivin) and other WNT molecules (TCF4, LRP5/6, p-LRP5/6, Axin1 and dishevelled) in RCC cell lines ACHN and A498, human embryonic kidney HEK293T cells and normal kidney epithelial HK-2 cells. (E) Representative high-performance liquid chromatography (HPLC) of ovatodiolide revealed the purity of compounds to be ~95% pure.

**Figure S2.** As Figure 2, ovatodiolide inhibits RCC cell viability and induces apoptosis in ACHN and A498 RCC cell lines. (A) The effect of ovatodiolide on cell viability was evaluated in ACHN and A498 cells by MTT assay at various times. The IC<sub>50</sub> at 48 hr and the relative viability (the percentage of MTT absorbance) were shown. Data are mean $\pm$ SD of triplicate experiments. (B) The original data for Figure 2A and S2A were re-plotted with absorbance 570 nm on MTT assay by treatment time for RCC and

HK-2 cells. (C) Flow cytometry of the effect of ovatodiolide on cell cycle distribution. ACHN and A498 cells were treated with 40  $\mu$ M ovatodiolide for 48 hr, and sub-G1 and G2/M populations were measured. Data are mean $\pm$ SD of triplicate experiments. (D) Western blot analysis of protein levels of cleaved caspase 3, 8, 9, and PARP and apoptotic proteins Bax, Bid and PUMA and antiapoptotic proteins Bcl-2, Bcl-xL and survivin in ACHN and A498 cellstreated with ovatodiolide for 24 or 48 hr. (E) A sub-IC50 concentration (15 $\mu$ M) was also examined in Caki-1 and 786-O cells for 24h and 48h. The sub-IC50 concentration also reduced levels of active  $\beta$ -catenin (p-Ser552- $\beta$ -catenin) and its downstream genes (c-myc, cyclin D1 and survivin) but not other WNT molecules (TCF4), LRP5/6 and its active phosphorylated form, Axin1, and disheveled.

**Figure S3.** As Figure 3, ovatodiolide inhibits RCC cell migration, invasion and tumorigenicity. (A) Wound healing assay of four cell lines with ovatodiolide concentrations for 24 and 48 hr. The wound-repair area was imaged under the same field every 24 hr and quantified. (B) Western blot analysis of protein levels of matrix metalloproteinase 2 (MMP-2) and MMP-9 with 20  $\mu$ g of each cell lysate. Activities were evaluated by 0.1% gelatin zymography with 50  $\mu$ g conditioned media. (C) RT-PCR quantification of effect of ovatodiolide (40  $\mu$ M for 24 hr) on mRNA level of  $\beta$ -catenin. (D) Ovatodiolide for 24 hr dose-dependently reduced  $\beta$ -catenin nuclear translocation in Caki-1 and 786-O cells. (E) Ovatodiolide-induced  $\beta$ -catenin degradation is not lysosome-mediated. Ovatodiolide co-treated with lysosomal inhibitors (10 and 20  $\mu$ M chloroquine or 10 and 20  $\mu$ M NH<sub>4</sub>Cl) for 48 hr had no effect on  $\beta$ -catenin protein levels. (F) Immunoprecipitation and western blot analysis of protein

levels of  $\beta$ -catenin – TCF4 and  $\beta$ -catenin – E-cadherin interaction in four RCC cells and HEK293T cells.

**Figure S4.** (A) 786-O and ACHN cells were xenografted each in six mice. Xenografted mice were treated with 100  $\mu$ g/kg ovatodiolide and DMSO control were shown. (B) Tumor, lung and liver weight, and (C) Body weight of 50  $\mu$ g/kg, 100  $\mu$ g/kg ovatodiolide treatment or DMSO control. Data are mean $\pm$ SD of triplicate experiments. (D) Ovatodiolide- and DMSO-treated 786-O- or ACHN-xenografted mice showed no systemic toxic effects. Representative sections of major organs, including brain (cerebrum and cerebellum), heart, liver, spleen, lung, kidney, stomach, intestine, and urine bladder, underwent hematoxylin and eosin staining.

**Figure S5.** (A) AKT inhibitor treatment induced effects similar to that of ovatodiolide and constitutively active AKT abrogated the ovatodiolide-induced inhibition of WNT/ $\beta$ -catenin signaling. In the left column, RCC cells were treated with 40  $\mu$ M ovatodiolide, or co-treatment with AKT inhibitor VIII (5  $\mu$ M) and ovatodiolide for 24 hr, and levels of p- $\beta$ -catenin (S552) and  $\beta$ -catenin were examined. In the right column, RCC cells were transfected with 2 $\mu$ g constitutively active AKT plasmid (addgene#14751) for 24 hr, then treated with 40  $\mu$ M ovatodiolide for an additional 24 hr. Ovatodiolide obviously reduced p- $\beta$ -catenin (S552) and slightly reduced  $\beta$ -catenin. Constitutively active AKT induced higher levels of p- $\beta$ -catenin (S552), p-Foxo3a (T32), p-mTOR (S2448) and p-p70S6K (T389), and it also abrogated most of the ovatodiolide inhibited p- $\beta$ -catenin (S552) level. Nevertheless, ovatodiolide treatment did not modify AKT-induced p-Foxo3a (T32), p-mTOR (S2448) and p-p70S6K (T389) levels. (B) RT-PCR quantification of mRNA levels of WNT/ $\beta$ -catenin signaling targets

Axin2, Nkd1 and Sp5 in RCC cells treated with ovatodiolide (40  $\mu$ M) with/without AKT inhibitors VIII (5  $\mu$ M) or 2 $\mu$ g constitutively active AKT plasmid. (C) Schematic diagram depicts the mechanism of inactivation of  $\beta$ -catenin by ovatodiolide in RCC cells.

**Figure S6.** (A) The effect of constitutively active Akt also partially rescued the ovatodiolide-induced cell death. (B) The physically binding between ovatodiolide and beta-catenin was simulated on the molecular docking website PATCHDOCK with the 3D structure files for ovatodiolide (PubChem: CID\_6451060) and beta-catenin (PDB: 1QZ7). The ovatodiolide inserted into the  $\beta$ -catenin molecule enclosing by the AKT phosphorylation site, Ser-552 residue, and may result in a stereochemical change to reduce its activation. There is no proper 3D structure including N-terminus of  $\beta$ -catenin and it is uneasy to evaluate whether ovatodiolide also bound to the GSK3 $\beta$  targeting Ser33, Ser37 or Thr41 residues.

# Figure S1

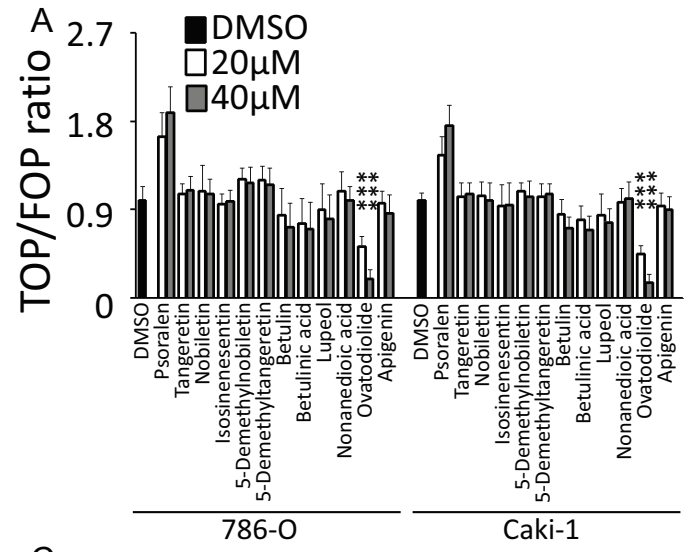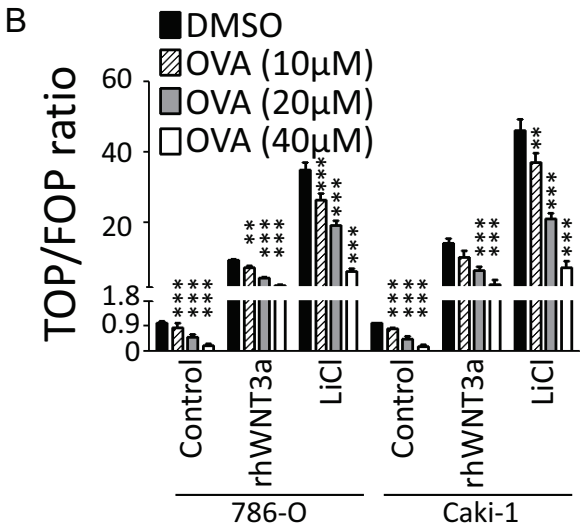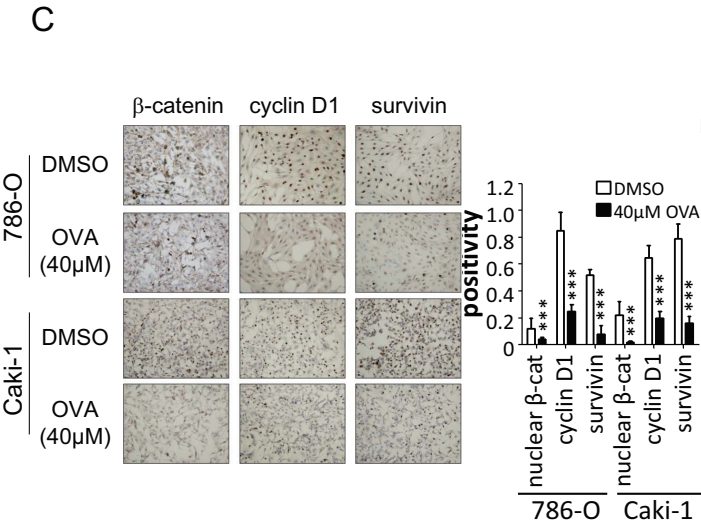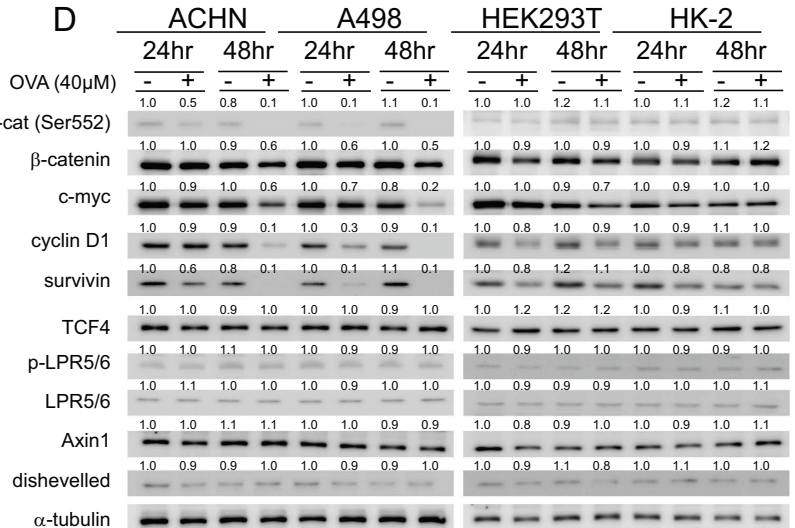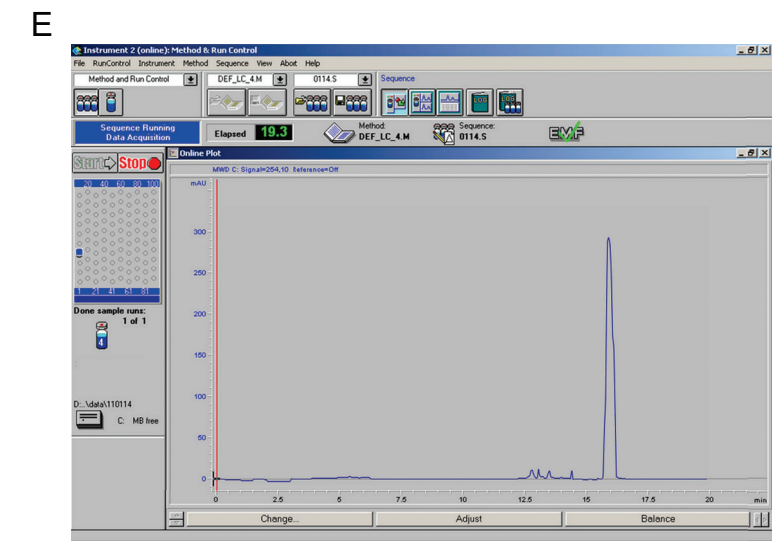

# Figure S2

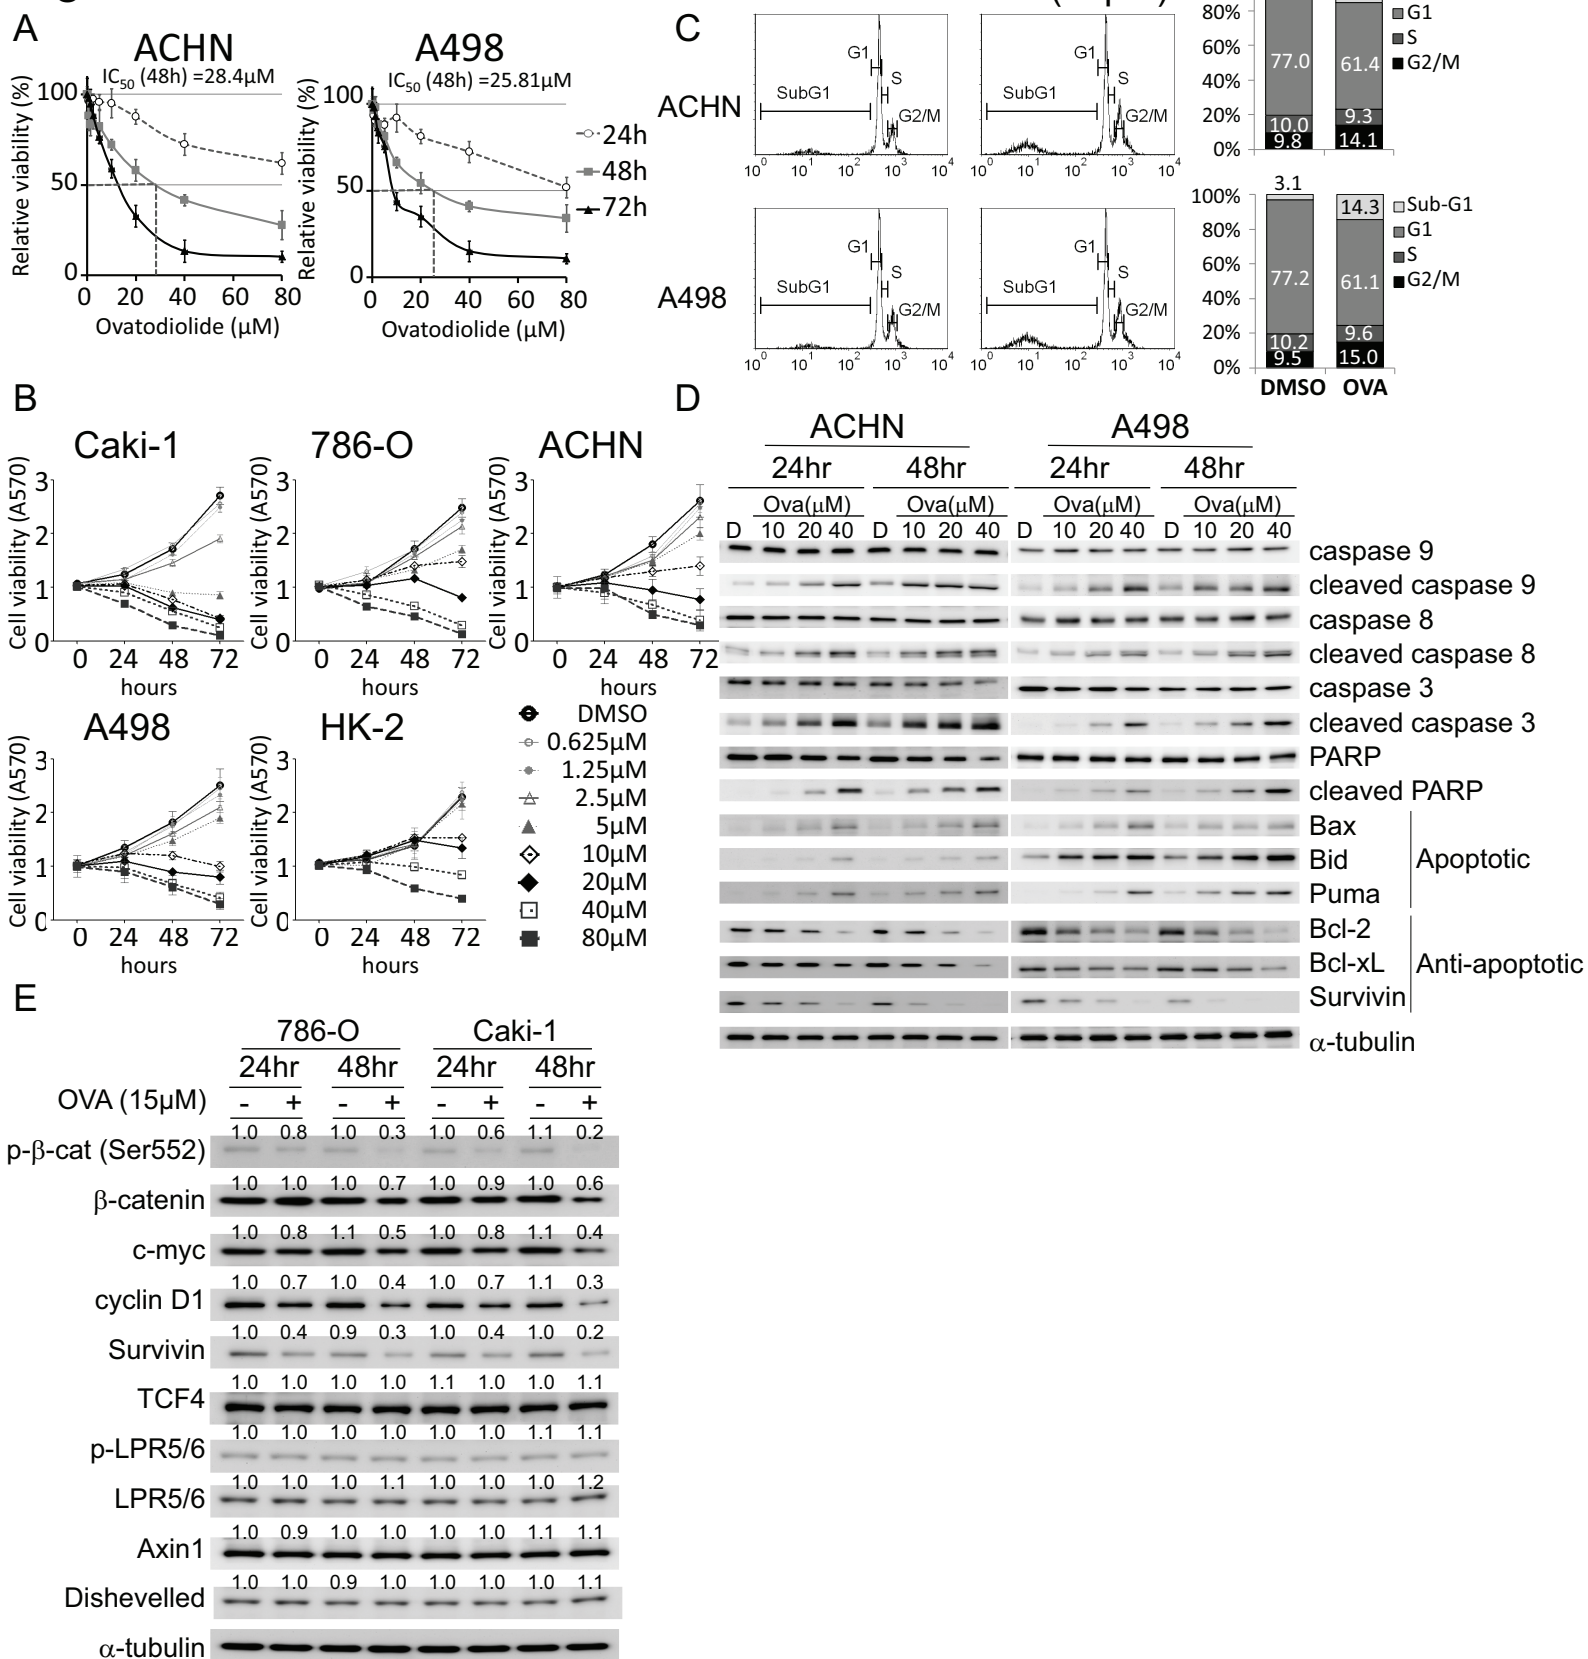

# Figure S3

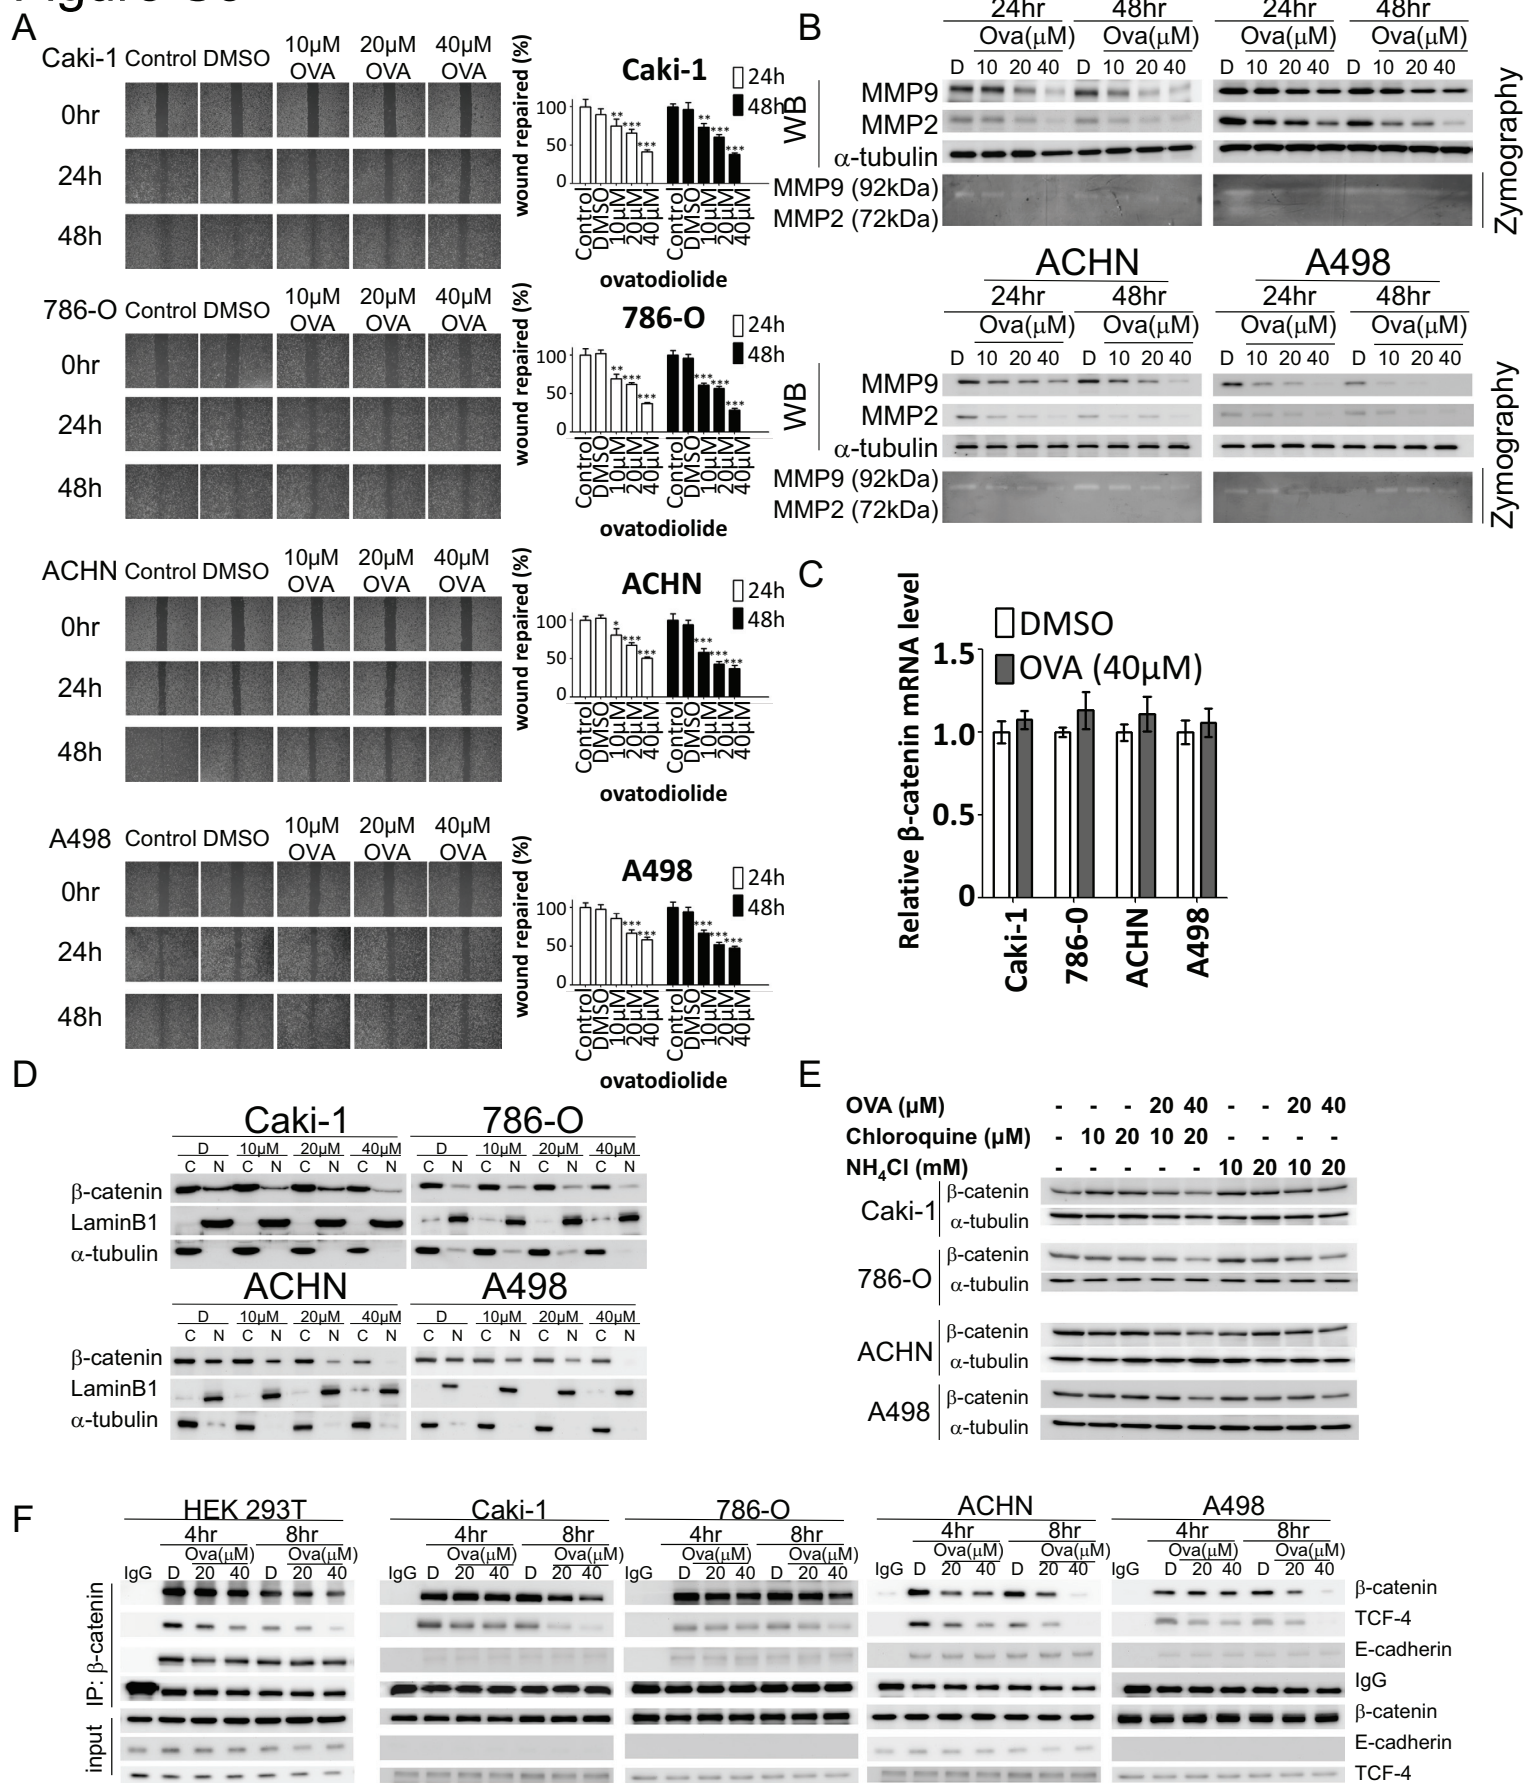

Figure S4

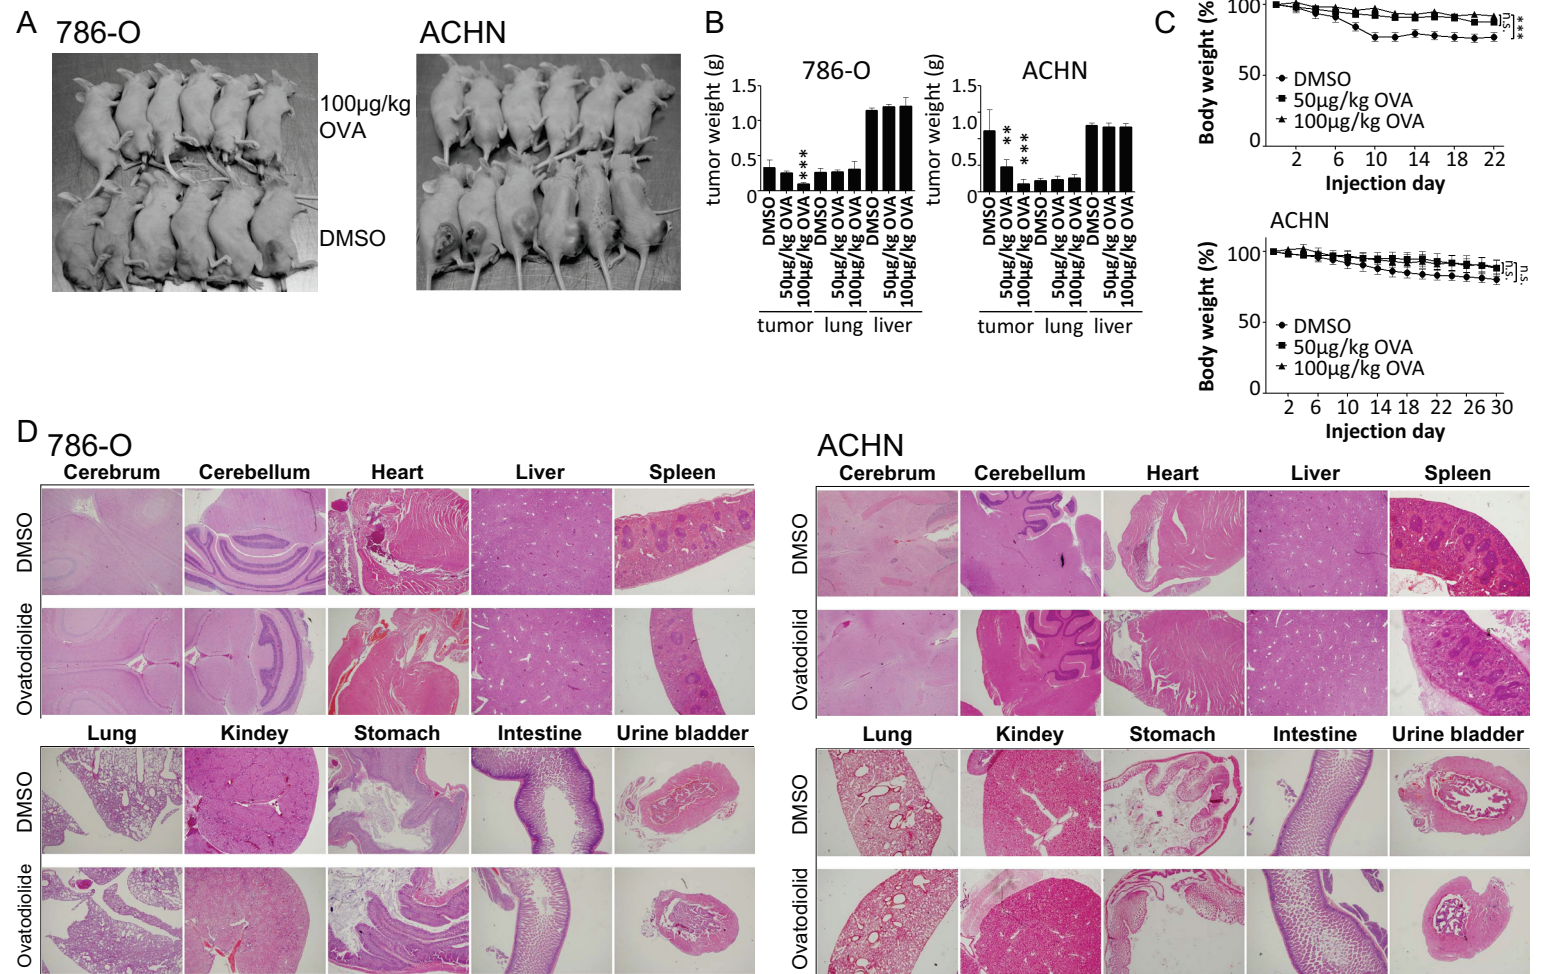



Figure S5

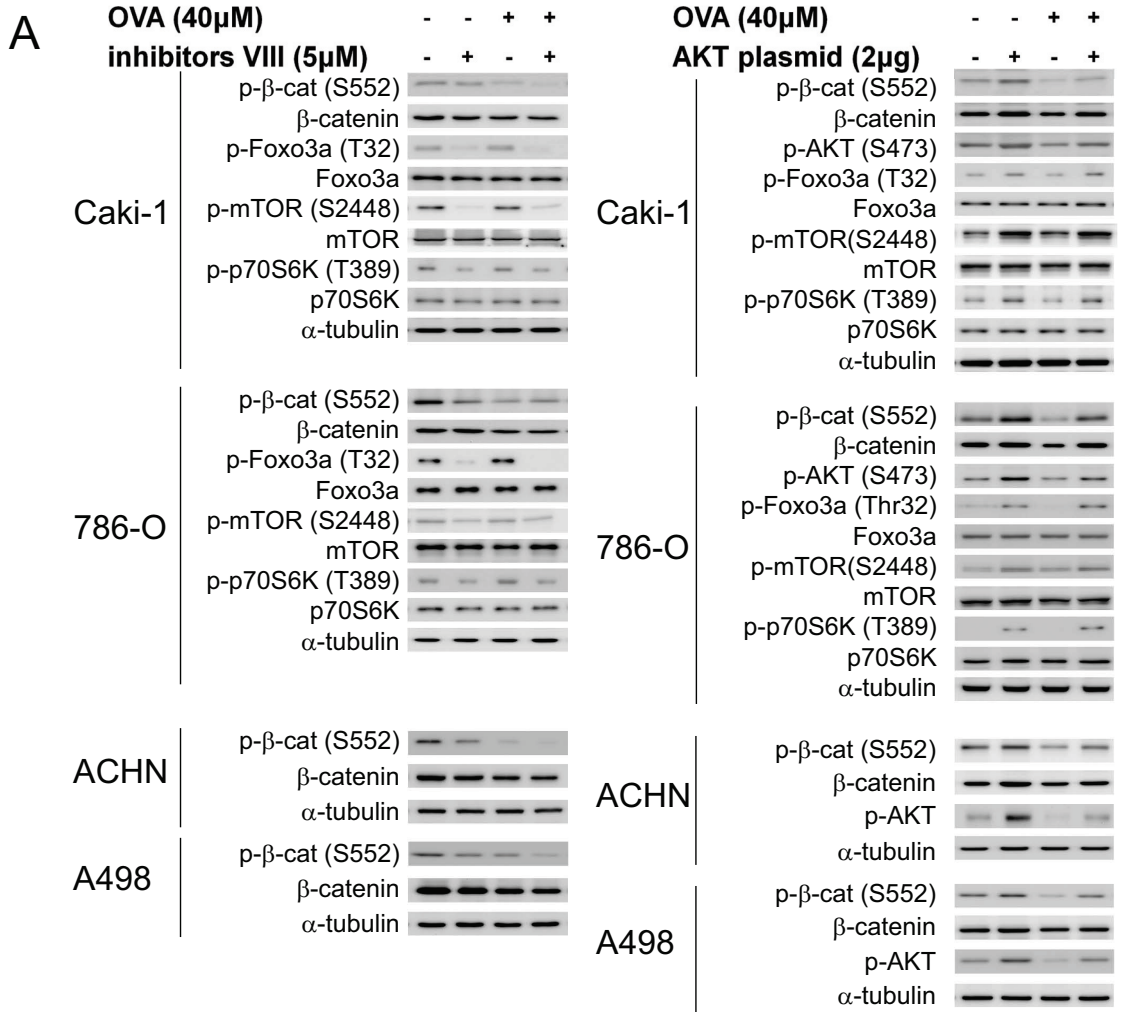

**B**

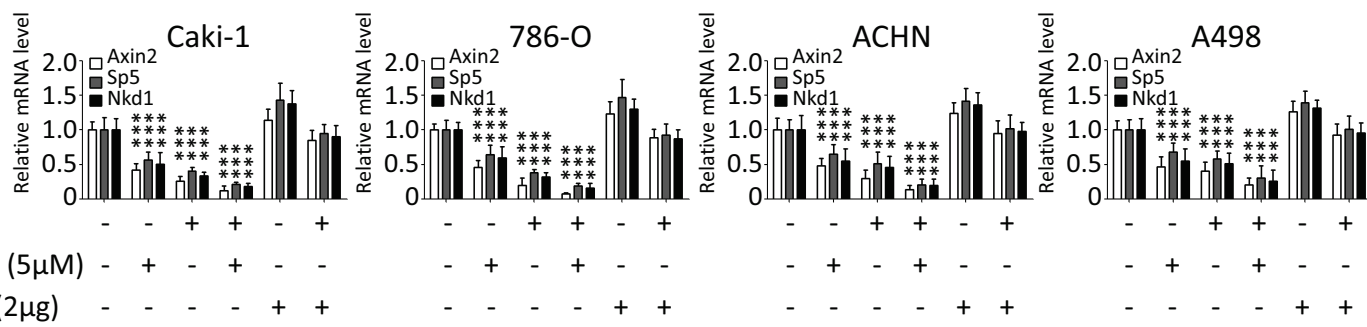

**C**

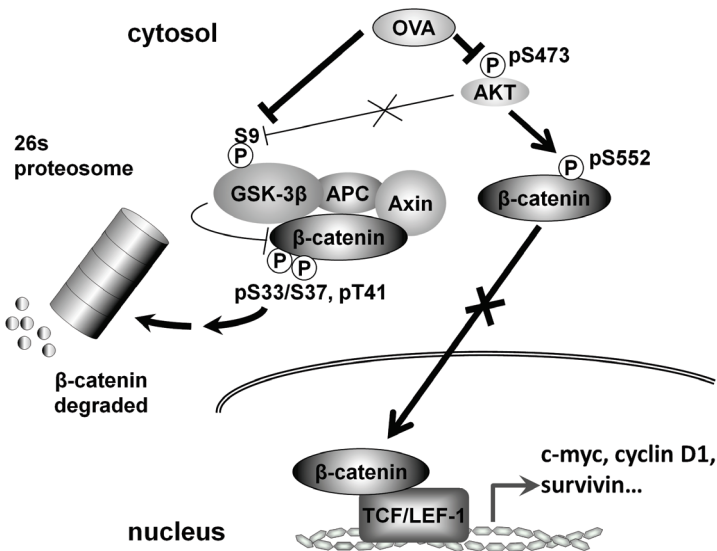

Figure S6

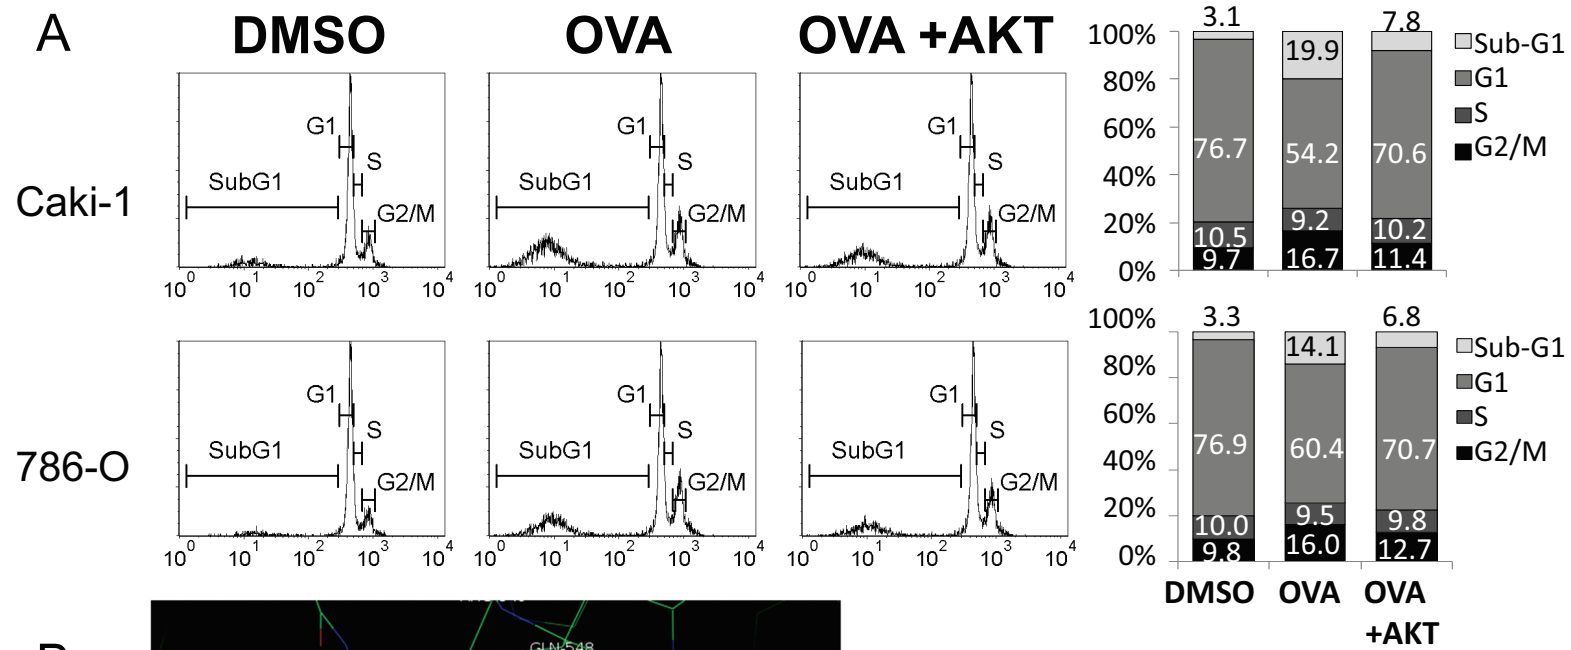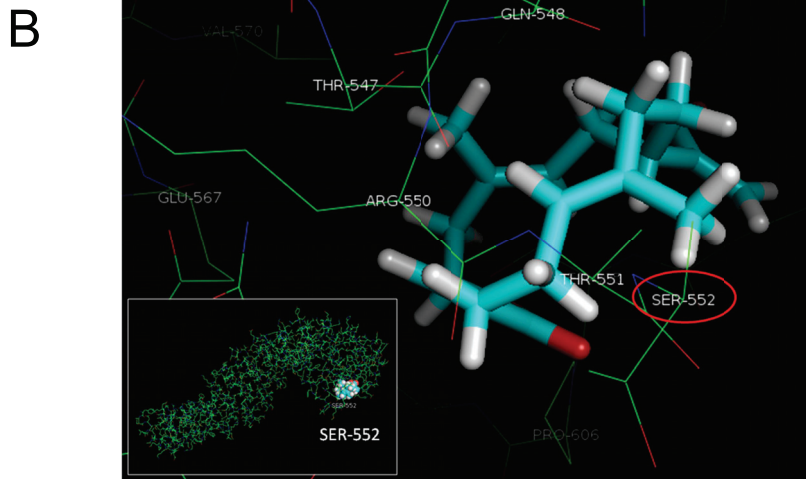

**Table S1**

| Compound                               | PubChem BioActivity |                                                                                                         |
|----------------------------------------|---------------------|---------------------------------------------------------------------------------------------------------|
|                                        | Outcome             | IC50                                                                                                    |
| <b><i>Citrus reticulata</i> Blanco</b> |                     |                                                                                                         |
| Nobiletin                              | Active              | 40µM In vitro cytotoxic potency against NCI-60 human tumor cell line                                    |
| Tangeretin                             | Active              | 41.2µM Growth inhibition of human SHSY5Y cells assessed as viable cells after 48 hrs by Trypan blue dye |
| 5-Demethylnobiletin                    | Active              | 2.07µM Antiproliferative activity against HL60 after 24 hrs                                             |
| 5-Demethyltangeretin                   | Active              | <= 50uM or explicitly reported as active by ChEMBL                                                      |
| Isosinensetin                          | Active              | 28µM Anticancer activity against human HT-29 cells after 72 hrs by MTT assay                            |
| β-Myrcene                              | Inactive            | Not shown                                                                                               |
| α-Pinene                               | Inactive            | Not shown                                                                                               |
| Naringin                               | Inactive            | Not shown                                                                                               |
| Hesperetin                             | Inactive            | Not shown                                                                                               |
| Limonene                               | Inactive            | Not shown                                                                                               |
| Sabinene                               | Inactive            | Not shown                                                                                               |
| Linalool                               | Inactive            | Not shown                                                                                               |
| Hesperidin                             | Unspecified         | 142µM Anticancer activity against human HT-29 cells after 72 hrs by MTT assay                           |
| 3-Carene                               | Unspecified         | NA                                                                                                      |
| Sinensetin                             | Unspecified         | 67µM Anticancer activity against human HT-29 cells after 72 hrs by MTT assay                            |
| β-Pinene                               | Untested            | Not shown                                                                                               |
| Terpinolene                            | Untested            | Not shown                                                                                               |
| Limonene oxide                         | Untested            | Not shown                                                                                               |
| Decanal                                | Untested            | Not shown                                                                                               |
| α-Phellandrene                         | Untested            | Not shown                                                                                               |
| Tetramethyl-O-isoscutellarein          | Untested            | Not shown                                                                                               |
| <b><i>Hibiscus syriacus</i> L.</b>     |                     |                                                                                                         |
| Betulin                                | Active              | 1.4µM Cytotoxicity against human WI 38 cells after 48 hrs by WST-8 assay                                |
| Betulinic acid                         | Active              | 0.026µM Cytotoxicity against human HeLa cells after 72 hrs by MTT assay                                 |
| Lupeol                                 | Active              | <= 50uM or explicitly reported as active by ChEMBL                                                      |
| Nonanedioic acid                       | Active              | 42.1µM Cytotoxicity against human MCF7 cells by MTT assay                                               |
| Suberic acid                           | Inactive            | Not shown                                                                                               |
| Myristic acid                          | Inactive            | Not shown                                                                                               |
| Palmitic acid                          | Inactive            | Not shown                                                                                               |
| Lauric acid                            | Inactive            | Not shown                                                                                               |
| Canthin-6-one                          | Inactive            | 50µM Cytotoxicity against human HepG2 cells upto 50 uM by neutral red assay                             |
| (+)-pinosresinol                       | Inactive            | Not shown                                                                                               |
| Syringaresinol                         | Unspecified         | Cytotoxicity against human KB cells                                                                     |
| Feruloyltyramines                      | Unspecified         | 38µMc Growth inhibition of mouse B16 2F2 cells after 3 days                                             |
| 1,22-Docosanediol                      | Unspecified         | 100µM, cytotoxicity against human A549 cells after 72 hrs by MTT assay                                  |
| 1-Octacosanol                          | Untested            | Not shown                                                                                               |
| Erythrotriol                           | Untested            | Not shown                                                                                               |
| 3'-Hydroxydaidzein                     | Untested            | Not shown                                                                                               |

**Table S1 (continued)**

---

***Anisomeles indica* L.**

---

|                            |             |                                                          |
|----------------------------|-------------|----------------------------------------------------------|
| Ovatodiolide               | Active      | 1.4µM, HepG2 cells after 48 hrs                          |
| Apigenin                   | Active      | 35µM, cytotoxicity against human H9 cells after 3 days   |
| Arjunolic acid             | Inactive    | Not shown                                                |
| Citral                     | Inactive    | Not shown                                                |
| Limonene                   | Inactive    | Not shown                                                |
| Methyl gallate             | Inactive    | Not shown                                                |
| Eugenol                    | Inactive    | Not shown                                                |
| Malic acid                 | Inactive    | Not shown                                                |
| Stigmasterol               | Unspecified | 50µM, cytotoxicity against human HeLa cells by MTT assay |
| Hederagenin                | Unspecified | Not shown                                                |
| Acetoside                  | Unspecified | Not shown                                                |
| Isoacetoside               | Untested    | Not shown                                                |
| Calceolarioside A          | Untested    | Not shown                                                |
| Compneoside                | Untested    | Not shown                                                |
| 3, 4-Dihydroxybenzoic acid | Untested    | Not shown                                                |
| Terniflorin                | Untested    | Not shown                                                |
| Anisofolin A               | Untested    | Not shown                                                |
| Iso-ovatodiolide           | Untested    | Not shown                                                |
| Anisomelic acid            | Untested    | Not shown                                                |
| Borneol                    | Untested    | Not shown                                                |
| α- Terpineol               | Untested    | Not shown                                                |
| Azullene                   | Untested    | Not shown                                                |
| Caryophyllene              | Untested    | Not shown                                                |

---

**Table S2**

| Gene             | Forward                       | Reverse                       |
|------------------|-------------------------------|-------------------------------|
| $\beta$ -catenin | 5'-AAAATGGCAGTGCGTTTAG-3'     | 5'-TTTGAAGGCAGTCTGTCGTA-3'    |
| AXIN2            | 5'-CCCAAGCCCCATAGTGCCCAAAG-3' | 5'-CAGGGGAGGCATCGCAGGGTC- 3'  |
| SP5              | 5'-GCGGCGAGGGGCAAGGGC-3'      | 5'- CGCCGAGGCATGGACACCCG-3'   |
| NKD1             | 5'-TCACTCCAAGCCGGCCGCC-3'     | 5'-TCCC GG GTGCTTCGGCCTATG-3' |
| GAPDH            | 5'-TGTTGCCATCAATGACCCCTT-3'   | 5'-CTCCACGACGTA CT CAGCG-3'   |

**Table S3**

| <b>Gene</b>                            | <b>Manufacturer and product number</b>   |
|----------------------------------------|------------------------------------------|
| AKT                                    | Cell Signal Tech.#4691                   |
| Phospho-AKT (Ser473)                   | Cell Signal Tech.#4060                   |
| Bax                                    | Cell Signal Tech.#5023                   |
| Bcl-2                                  | Epitomics #1017                          |
| Bcl-xL                                 | Epitomics #1018                          |
| $\beta$ -catenin                       | Epitomics #1247                          |
| Phospho- $\beta$ -catenin (S552)       | Cell Signal Tech.#9566                   |
| Phospho- $\beta$ -catenin (S33/37,T41) | Cell Signal Tech.#9561                   |
| Bid                                    | Clone FL-195, Santa cruz#SC-11423        |
| Caspase-3                              | Cell Signal Tech. #9662                  |
| Cleaved Caspase-3                      | Cell Signal Tech. #9664                  |
| Caspase-8                              | Cell Signal Tech. #4790                  |
| Cleaved Caspase-8                      | Cell Signal Tech.#9496                   |
| Caspase-9                              | Cell Signal Tech.#9502                   |
| Cleaved Caspase-9                      | Cell Signal Tech.#9501                   |
| c-myc                                  | Clone 9E11, Santa Cruz Biotech.#sc-47694 |
| cyclin D1                              | Clone DCS-6, Cell Signaling Tech. #2926  |
| E-cadherin                             | Epitomics #1702                          |
| ERK-1                                  | Epitomics #1172                          |
| Phospho-ERK1 (T202)                    | Epitomics #1481                          |
| GAPDH                                  | Epitomics #2251                          |
| GSK3                                   | Cell Signal Tech.#9315                   |
| Phospho-GSK3 (Ser9)                    | Cell Signal Tech.#9322                   |
| Ki-67                                  | Dako Clone MIB-1 #M7240                  |
| Lamin B1                               | Epitomics #6581                          |
| MEK-1                                  | Epitomics #1235                          |
| Phospho-MEK1 (S217/221)                | Epitomics #T3735                         |
| MMP-2                                  | Lab Vision #RB-1537                      |
| MMP-9                                  | Lab Vision # RB-1539                     |
| PARP                                   | Cell Signal Tech.#9542                   |
| Cleaved PARP                           | Cell Signal Tech.#5625                   |
| PUMA                                   | Cell Signal Tech.#4976                   |
| RAF1                                   | Cell Signal Tech.#9422                   |
| Phospho-RAF1 (S338)                    | Cell Signal Tech.#9427                   |
| RAS                                    | Cell Signal Tech.#3339                   |
| STAT3                                  | Epitomics #2281                          |
| Phospho-STAT3 (Y705)                   | Epitomics #2236                          |
| Survivin                               | Epitomics #2463                          |
| TCF4                                   | Epitomics #2114                          |
| $\alpha$ -tubulin                      | Clone DM1A, Lab Vision#MS-581            |
